# Supplementary material for: The Use of a Quasi-Experimental Study on the Mortality Effect of a Heat Wave Warning System in Korea
Source: Int J Environ Res Public Health. 2019 Jun 25;16(12):2245. doi: 10.3390/ijerph16122245 (PMC6617315; doi:10.3390/ijerph16122245)
Supplement: Supplementary file 1 [file ijerph-16-02245-s001.pdf]

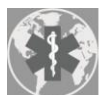

# Supplementary Materials: The Use of a Quasi-Experimental Study on the Mortality Effect of a Heat Wave Warning System in South Korea

Seulkee Heo <sup>1,\*</sup>, Amruta Nori-Sarma <sup>1</sup>, Kwonsang Lee <sup>2</sup>, Tarik Benmarhnia <sup>3</sup>,  
Francesca Dominici <sup>2</sup> and Michelle L. Bell <sup>1</sup>

<sup>1</sup> School of Forestry and Environmental Studies, Yale University, New Haven, CT 06520, USA; amrutasri.nori-sarma@yale.edu (A.N.-S.); michelle.bell@yale.edu (M.L.B.)

<sup>2</sup> Harvard T. H. Chan School of Public Health, Harvard University, Boston, MA 02115, USA; kwonsanglee@hsph.harvard.edu (K.L.); fdominic@hsph.harvard.edu (F.D.)

<sup>3</sup> Department of Family Medicine and Public Health and Scripps Institution of Oceanography, University of California San Diego, La Jolla, CA 92093, USA; tbenmarhnia@ucsd.edu

\* Correspondence: seulkee.heo@yale.edu

## Contents.

**Figure S1.** Changes in proportions (%) of the types of heat wave days for intervals of daily mean temperature (°C).

**Figure S2.** Flow chart of the statistical methods.

**Table S1.** Effects of the heat wave warning system on all-cause mortality per 1,000,000 people per day (2009-2014).

**Table S2.** Percentages of false positive and false negative heat wave days by city and year.

**Table S3.** Estimated effects of the heat wave warning system on cardiovascular and respiratory deaths per 1,000,000 population per day, based on propensity score weights truncated at the 99 percentile.

**Table S4.** Effects of effects of the heat wave warning system on mortality in different age groups of children and adolescents (2009-2014).

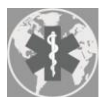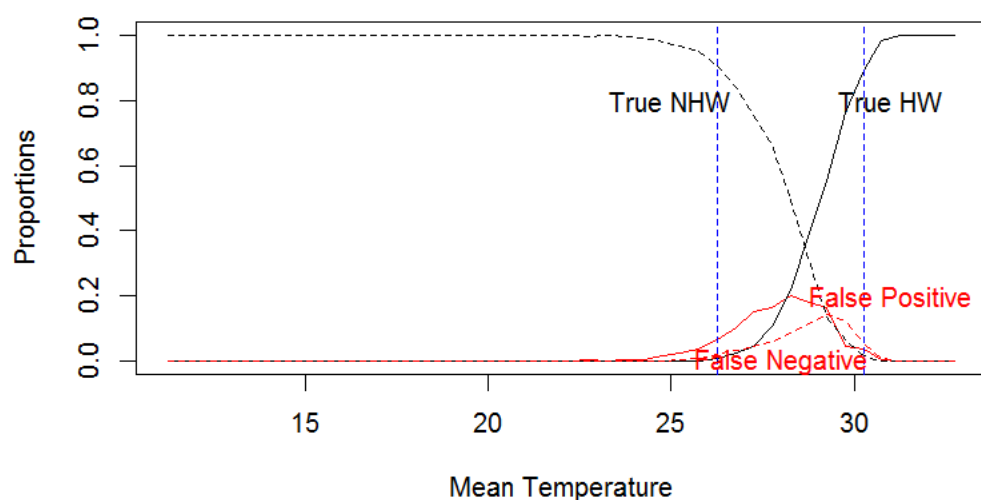

**Figure S1.** Changes in proportions (%) of the types of heat wave days for intervals of daily mean temperature (°C).

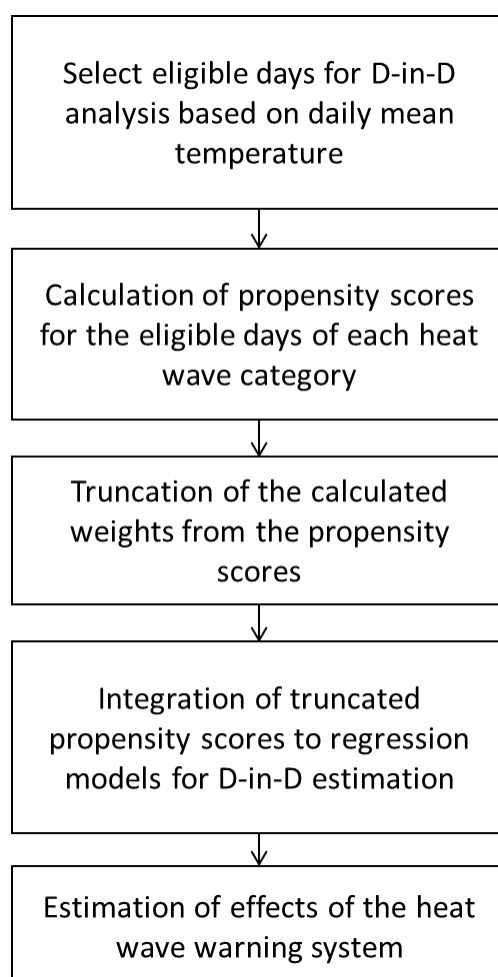

**Figure S2.** Flow chart of the statistical methods.

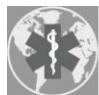

**Table S1.** Effects of the heat wave warning system on all-cause mortality per 1,000,000 people per day (2009–2014).

|                            | Estimate | (95% CI)           |
|----------------------------|----------|--------------------|
| Total                      | 1.687    | (1.118, 2.255)     |
| Sex                        |          |                    |
| Men                        | 2.579    | (1.749, 3.409)     |
| Women                      | 0.795    | (0.054, 1.537)     |
| Age                        |          |                    |
| 0–19                       | −0.555   | (−0.993, −0.117) * |
| 20–64                      | 0.858    | (0.412, 1.324)     |
| 65+                        | 5.939    | (2.215, 9.663)     |
| 75+                        | 5.500    | (−0.236, 14.237)   |
| Job status (age)           |          |                    |
| White-collar (19–64)       | 0.249    | (0.079, 0.418)     |
| White-collar (65+)         | 1.423    | (0.812, 2.033)     |
| White-collar (75+)         | 2.400    | (1.233, 3.567)     |
| Blue-collar (19–64)        | 0.520    | (0.291, 0.750)     |
| Blue-collar (65+)          | 2.166    | (1.001, 3.330)     |
| Blue-collar (75+)          | 4.909    | (2.976, 6.841)     |
| Unemployment (19–64)       | 0.147    | (−0.19, 0.484)     |
| Unemployment (65+)         | 1.764    | (−1.736, 5.263)    |
| Unemployment (75+)         | −2.673   | (−11.068, 5.722)   |
| Marital status (age)       |          |                    |
| Single (19–64)             | 0.294    | (0.088, 0.501)     |
| Single (65+)               | 0.164    | (−0.336, 0.663)    |
| Single (75+)               | −0.440   | (−1.568, 0.688)    |
| Married (19–64)            | 0.186    | (−0.147, 0.519)    |
| Married (65+)              | 4.323    | (1.816, 6.831)     |
| Married (75+)              | 8.315    | (3.222, 13.409)    |
| Divorced (19–64)           | 0.201    | (0.009, 0.393)     |
| Divorced (65+)             | 0.741    | (−0.014, 1.496)    |
| Divorced (75+)             | 0.577    | (−0.718, 1.872)    |
| Widowed (19–64)            | 0.154    | (0.057, 0.251)     |
| Widowed (65+)              | 0.844    | (−1.895, 3.583)    |
| Widowed (75+)              | −2.671   | (−9.906, 4.563)    |
| Education (age)            |          |                    |
| None (19–64)               | −0.144   | (−0.227, −0.061) * |
| None (65+)                 | 3.187    | (1.253, 5.120)     |
| None (75+)                 | 7.886    | (2.823, 12.949)    |
| Elementary (19–64)         | 0.363    | (0.205, 0.521)     |
| Elementary (65+)           | 4.239    | (2.070, 6.408)     |
| Elementary (75+)           | 1.577    | (−3.359, 6.512)    |
| 7–12th grade (19–64)       | 0.764    | (0.446, 1.081)     |
| 7–12th grade (65+)         | 4.646    | (2.845, 6.447)     |
| 7–12th grade (75+)         | 8.733    | (5.127, 12.34)     |
| University or more (19–64) | 0.564    | (0.372, 0.756)     |
| University or more (65+)   | 0.845    | (−0.101, 1.792)    |
| University or more (75+)   | −0.189   | (−2.250, 1.872)    |

Notes. Statistically significant results (significant level = 0.05) are marked with an asterisk (\*).

**Table S2.** Percentages of false positive and false negative heat wave days by city and year.

| City  | False Positive Heat<br>Wave Days | False Negative Heat<br>Wave Days | Year | False Positive Heat<br>Wave Days | False Negative Heat<br>Wave Days |
|-------|----------------------------------|----------------------------------|------|----------------------------------|----------------------------------|
|       | Percent (%)                      | Percent (%)                      |      | Percent (%)                      | Percent (%)                      |
| Seoul | 3.2%                             | 1.6%                             | 2009 | 1.4%                             | 1.4%                             |
| Busan | 3.5%                             | 0.8%                             | 2010 | 5.1%                             | 2.6%                             |
| Daegu | 6.5%                             | 3.8%                             | 2011 | 2.7%                             | 2.0%                             |



|         |      |      |      |      |      |
|---------|------|------|------|------|------|
| Incheon | 0.5% | 3.0% | 2012 | 5.0% | 1.2% |
| Gwangju | 6.3% | 0.1% | 2013 | 7.7% | 1.8% |
| Daejeon | 5.0% | 1.0% | 2014 | 1.6% | 1.0% |
| Ulsan   | 7.5% | 0.8% |      |      |      |

**Table S3.** Estimated effects of the heat wave warning system on cardiovascular and respiratory deaths per 1,000,000 population per day, based on propensity score weights truncated at the 99 percentile (2009–2014).

|                            | Estimate (95% CI) |                     |
|----------------------------|-------------------|---------------------|
| Total                      | 1.176             | (0.596, 1.757)      |
| Age                        |                   |                     |
| 0–19                       | 0.266             | (−0.101, 0.634)     |
| 20–64                      | 0.503             | (0.036, 0.969)      |
| 65+                        | 1.567             | (−2.221, 5.354)     |
| 75+                        | −6.082            | (−14.973, 2.808)    |
| Sex                        |                   |                     |
| Men                        | 2.249             | (1.401, 3.098)      |
| Women                      | 0.099             | (−0.653, 0.851)     |
| Job status (age)           |                   |                     |
| White-collar (19–64)       | 0.047             | (−0.127, 0.222)     |
| White-collar (65+)         | 0.812             | (0.181, 1.442)      |
| White-collar (75+)         | 2.076             | (0.851, 3.300)      |
| Blue-collar (19–64)        | 0.407             | (0.173, 0.640)      |
| Blue-collar (65+)          | 3.178             | (2.012, 4.345)      |
| Blue-collar (75+)          | 5.350             | (3.339, 7.362)      |
| Unemployment (19–64)       | 0.088             | (−0.257, 0.434)     |
| Unemployment (65+)         | −2.833            | (−6.388, 0.723)     |
| Unemployment (75+)         | −14.144           | (−22.669, −5.618) * |
| Education (age)            |                   |                     |
| None (19–64)               | 0.006             | (−0.064, 0.076)     |
| None (65+)                 | 1.941             | (0.027, 3.855)      |
| None (75+)                 | 5.793             | (0.802, 10.783)     |
| Elementary (19–64)         | 0.420             | (0.256, 0.584)      |
| Elementary (65+)           | 5.339             | (3.128, 7.551)      |
| Elementary (75+)           | 4.256             | (−0.756, 9.267)     |
| 7–12th grade (19–64)       | 0.571             | (0.242, 0.900)      |
| 7–12th grade (65+)         | 4.652             | (2.816, 6.487)      |
| 7–12th grade (75+)         | 7.468             | (3.75, 11.185)      |
| University or more (19–64) | 0.410             | (0.213, 0.607)      |
| University or more (65+)   | 0.277             | (−0.704, 1.258)     |
| University or more (75+)   | −1.325            | (−3.473, 0.823)     |
| Marital status (age)       |                   |                     |
| Single (19–64)             | 0.150             | (−0.057, 0.356)     |
| Single (65+)               | 0.063             | (−0.457, 0.583)     |
| Single (75+)               | −0.707            | (−1.880, 0.467)     |
| Married (19–64)            | 0.037             | (−0.305, 0.380)     |
| Married (65+)              | 3.102             | (0.543, 5.660)      |
| Married (75+)              | 6.456             | (1.223, 11.688)     |
| Divorced (19–64)           | 0.103             | (−0.093, 0.298)     |
| Divorced (65+)             | 0.401             | (−0.382, 1.183)     |
| Divorced (75+)             | 0.550             | (−0.795, 1.896)     |
| Widowed (19–64)            | 0.179             | (0.079, 0.280)      |
| Widowed (65+)              | −1.837            | (−4.616, 0.942)     |
| Widowed (75+)              | −12.051           | (−19.373, −4.730) * |

Notes. Statistically significant results (significant level = 0.05) are marked with an asterisk (\*).



**Table S4.** Effects of effects of the **heat** wave warning system on mortality in different age groups of children and adolescents (2009–2014).

|                | Estimate | (95% CI)           |
|----------------|----------|--------------------|
| All-cause      |          |                    |
| Age 0–4        | −4.570   | (−6.305, −2.835) * |
| Age 5–19       | 0.480    | (0.151, 0.809)     |
| Age 0–19       | −0.555   | (−0.993, −0.117) * |
| Cardiovascular |          |                    |
| Age 0–4        | 0.027    | (−0.035, 0.090)    |
| Age 5–19       | −0.025   | (−0.092, 0.041)    |
| Age 0–19       | −0.016   | (−0.072, 0.039)    |
| Respiratory    |          |                    |
| Age 0–4        | −0.436   | (−0.615, −0.258) * |
| Age 5–19       | NA       |                    |
| Age 0–19       | −0.090   | (−0.128, −0.053) * |

Notes. Due to small number of deaths, the DD estimates were not estimated for respiratory mortality in children aged 5–19.
